# Supplementary material for: Surface-Exposed Protein Moieties of Burkholderia cenocepacia J2315 in Microaerophilic and Aerobic Conditions
Source: MDPI journal article supplement (doi:10.3390/vaccines12040398), 2024-04-09
Supplement: s1 [file s1]

# Surface-exposed protein moieties of *Burkholderia cenocepacia* J2315 in microaerophilic and aerobic conditions

António M.M. Seixas<sup>1,2</sup>, Carolina Silva<sup>1,2</sup>, Patrícia Mateus<sup>1,2</sup>, Manuel J. Rodríguez-Ortega<sup>3</sup>, Joana R. Feliciano<sup>1,2</sup>, Jorge H. Leitão<sup>1,2\*</sup>, Sílvia A. Sousa<sup>1,2\*</sup>

<sup>1</sup> Department of Bioengineering, IBB—Institute for Bioengineering and Biosciences, Instituto Superior Técnico, Universidade de Lisboa, Av. Rovisco Pais, 1049-001 Lisboa, Portugal

<sup>2</sup> Associate Laboratory, i4HB—Institute for Health and Bioeconomy at Instituto Superior Técnico, Universidade de Lisboa, Av. Rovisco Pais, 1049-001 Lisboa, Portugal

<sup>3</sup> Departamento de Bioquímica y Biología Molecular, Universidad de Córdoba, and Campus de Excelencia Internacional CeIA3, 14071 Córdoba, Spain

\* Correspondence: Sílvia A. Sousa, E-mail: sousasilvia@tecnico.ulisboa.pt; Jorge H. Leitão, E-mail: jorgeleitao@tecnico.ulisboa.pt. iBB - Institute for Bioengineering and Biosciences, Department of Bioengineering, Instituto Superior Técnico, Universidade de Lisboa, Lisboa, Portugal. Telephone: +351-218417688; Fax: +351-218419199

**Table S5** – Predicted moonlight proteins identified in *B. cenocepacia* J2315 by using the “surface shaving” strategy followed by LC-MS/MS (Threshold score:  $\geq 2$  peptides).

| ORF                                   | Description                                              | Canonical Function                                                                                                                                                           | Moonlight Function in other bacteria <sup>2</sup>                                                                                                                                                                         | PSM <sup>1</sup> | Peptides <sup>1</sup> | References |
|---------------------------------------|----------------------------------------------------------|------------------------------------------------------------------------------------------------------------------------------------------------------------------------------|---------------------------------------------------------------------------------------------------------------------------------------------------------------------------------------------------------------------------|------------------|-----------------------|------------|
| BCAL0201                              | N-acetyl-gamma-glutamyl-phosphate reductase (ArgC)       | Cytoplasm:<br>Catalyzes the conversion of N-acetyl-L-glutamate to N-acetyl-L-glutamate 5-phosphate (EC 1.2.1.38).                                                            | Cell surface:<br>Binds mucus and Caco-2 cells, and human ABO blood group antigens ( <i>Lactobacillus plantarum</i> ).                                                                                                     | 34               | 7                     | [1]        |
| BCAL0219/<br>BCAL0232*                | Elongation factor Tu (TufA)                              | Cytoplasm:<br>Elongation factor in protein synthesis.                                                                                                                        | Cell surface:<br>Attachment to human cells and mucins ( <i>Lactobacillus johnsonii</i> ).<br>Fibronectin binding ( <i>Mycoplasma pneumoniae</i> ).<br>Factor H and plasminogen binding ( <i>Pseudomonas aeruginosa</i> ). | 76               | 10                    | [2][3][4]  |
| BCAL0226                              | DNA-directed RNA polymerase subunit beta (RpoB)          | Cytoplasm:<br>Beta subunit of DNA-directed RNA polymerase (EC 2.7.7.6)                                                                                                       | Cell surface:<br>Salivary mucin binding protein Muc7 ( <i>Streptococcus gordonii</i> ).                                                                                                                                   | 15               | 7                     | [5]        |
| BCAL0231                              | Elongation factor G (FusA)                               | Cytoplasm:<br>Elongation factor in translation.                                                                                                                              | Cell surface:<br>Binds salivary mucin MUC7( <i>S. gordonii</i> )                                                                                                                                                          | 38               | 14                    | [5]        |
| BCAL0739                              | Phosphoglyceromutase (GpmA)                              | Cytoplasm:<br>Phosphoglycerate mutase (EC 5.4.2.11)                                                                                                                          | Cell surface:<br>Plasminogen binding ( <i>Bifidobacterium lactis</i> , <i>Bifidobacterium bifidum</i> , <i>Bifidobacterium longum</i> ).                                                                                  | 15               | 5                     | [6]        |
| (BCAL1001/<br>BCAL2869)*/<br>BCAL2829 | Serine endoprotease<br>DegP-like (MucD2/<br>MucD1/ HtrA) | Periplasm:<br>Serine endoprotease (EC 3.4.21.107).                                                                                                                           | Extracellular:<br>Cleaves E-cadherin to disrupt intercellular adhesion ( <i>Helicobacter pylori</i> ).                                                                                                                    | 71 / 28          | 18 / 7                | [7]        |
| BCAL1070/<br>BCAL3192                 | Peroxiredoxin, AhpC-type                                 | Cytoplasm:<br>Cell redox homeostasis (EC 1.11.1.24).                                                                                                                         | Cell surface:<br>Binds plasminogen ( <i>Neisseria meningitidis</i> ).                                                                                                                                                     | 17 / 42          | 6 / 8                 | [8]        |
| BCAL1919                              | Heat shock protein ClpB                                  | Cytoplasm:<br>Part of a stress-induced multi-chaperone system, it is involved in the recovery of the cell from heat-induced damage, in cooperation with DnaK, DnaJ and GrpE. | Extracellular:<br>Interact with host macrophages and mediates inflammatory immune response ( <i>Mycobacterium tuberculosis</i> ).                                                                                         | 4                | 2                     | [9]        |

|                                             |                                                       |                                                                                                                                                  |                                                                                                                                                                                                                                                                                 |             |            |             |
|---------------------------------------------|-------------------------------------------------------|--------------------------------------------------------------------------------------------------------------------------------------------------|---------------------------------------------------------------------------------------------------------------------------------------------------------------------------------------------------------------------------------------------------------------------------------|-------------|------------|-------------|
| <b>BCAL1990</b>                             | Glucose-6-phosphate isomerase                         | Cytoplasm:<br>Catalyzes interconversion of glucose-6-phosphate and fructose-6-phosphate in glycolysis and gluconeogenesis (EC 5.3.1.9).          | Cell Surface:<br>Laminin, collagen I binding ( <i>Lactobacillus crispatus</i> ).                                                                                                                                                                                                | 15          | 8          | [10]        |
| <b>BCAL1996</b>                             | ATP-dependent Clp protease proteolytic subunit (ClpP) | Cytoplasm:<br>Hydrolysis of proteins to small peptides in the presence of ATP and magnesium (EC 3.4.21.92).                                      | Cell Surface:<br>Binding of plasmin(ogen), fibronectin and binding and invasion to epithelial and endothelial cells ( <i>Streptococcus pneumoniae</i> ).                                                                                                                        | 25          | 5          | [11]        |
| <b>BCAL2013</b>                             | AhpC/TSA family protein                               | Cytoplasm:<br>Hydroxyperoxidase activity, antioxidant (EC 1.11.1.-).                                                                             | Cell surface:<br>Plasminogen binding ( <i>N. meningitidis</i> ).                                                                                                                                                                                                                | 29          | 6          | [8]         |
| <b>BCAL2122</b>                             | Malate synthase (AceB)                                | Cytoplasm:<br>Catalyzes the condensation and subsequent hydrolysis of acetyl-CoA and glyoxylate to form malate and CoA (EC 2.3.3.9)              | Cell surface:<br>Binds fibronectin, laminin and A549 lung epithelial cells ( <i>M. tuberculosis</i> ).                                                                                                                                                                          | 4           | 2          | [12]        |
| <b>BCAL2152/<br/>BCAL2153/<br/>BCAM0088</b> | Peptidyl-prolyl cis-trans isomerase (PpiA/ PpiB)      | Periplasm / Cytoplasm:<br>Catalyzes the cis-trans isomerization of proline imidic peptide bonds in oligopeptides (EC 5.2.1.8)                    | Extracellular:<br>Induces gastric epithelial cell apoptosis in a TLR4-dependent manner ( <i>H. pylori</i> ).                                                                                                                                                                    | 92 / 24 /14 | 17 / 6 / 4 | [13]        |
| <b>BCAL2179</b>                             | Enolase                                               | Cytoplasmic Membrane:<br>Catalyzes the reversible conversion of 2-phosphoglycerate into phosphoenolpyruvate. (EC. 4.2.1.11)                      | Cell surface:<br>Plasminogen binding ( <i>Aeromonas hydrophila</i> , <i>Borrelia burgdorferi</i> , <i>N. meningitidis</i> ).                                                                                                                                                    | 37          | 7          | [14]        |
| <b>BCAL2224</b>                             | Glutamine synthetase (GlnA)                           | Cytoplasm:<br>Synthesis of glutamine (EC 6.3.1.2)                                                                                                | Cell surface:<br>Binds fibronectin ( <i>M. tuberculosis</i> ).<br>Binding laminin ( <i>L. crispatus</i> ).<br>Plasminogen binding ( <i>M. tuberculosis</i> ; <i>L. crispatus</i> ; <i>B. lactis</i> ).<br>Binds collagen I and other bacterial species ( <i>L. crispatus</i> ). | 10          | 2          | [10][15][6] |
| <b>BCAL2346</b>                             | Triosephosphate isomerase (TpiA)                      | Cytoplasm:<br>Catalyzes the reversible interconversion of dihydroxyacetone phosphate and D-glyceraldehyde 3-phosphate (glycolysis) (EC 5.3.1.1). | Cell surface:<br>Plasminogen binding ( <i>Streptococcus anginosus</i> , <i>Streptococcus oralis</i> ).<br>Adhesin, contact-mediated killing of <i>Cryptococcus</i> ( <i>Staphylococcus aureus</i> ).                                                                            | 9           | 4          | [16][17]    |

---

|                 |                                                                |                                                                                                                                                                           |                                                                                                                                                                 |    |    |              |
|-----------------|----------------------------------------------------------------|---------------------------------------------------------------------------------------------------------------------------------------------------------------------------|-----------------------------------------------------------------------------------------------------------------------------------------------------------------|----|----|--------------|
| <b>BCAL2433</b> | Transaldolase B (TalB)                                         | Cytoplasm:<br>Important for the balance of metabolites in the pentose-phosphate pathway (EC 2.2.1.2)                                                                      | Extracellular:<br>Binds mucin ( <i>B. longum</i> ).                                                                                                             | 62 | 13 | [18]         |
| <b>BCAL2730</b> | Putative ATP-dependent Clp protease ATP-binding subunit (ClpA) | Cytoplasm:<br>Protease ATP-dependent protein. Chymotrypsin-like activity. Major role in the degradation of misfolded proteins.                                            | Cell surface:<br>Binding of plasminogen and fibronectin. Adhesion and invasion of epithelial and endothelial cells ( <i>S. pneumoniae</i> ).                    | 12 | 4  | [11]         |
| <b>BCAL2757</b> | Superoxide dismutase (SodB)                                    | Periplasm:<br>Superoxide dismutase (EC 1.15.1.1)                                                                                                                          | Cell surface:<br>Adhesin binding mucus-associated proteins. Binding to epithelial cell aldolase, GAPDH and cyclophilin A ( <i>Mycobacterium avium</i> ).        | 42 | 5  | [19]         |
| <b>BCAL2767</b> | Ornithine carbamoyltransferase (ArgF)                          | Cytoplasm:<br>Reversibly catalyzes the transfer of the carbamoyl group from carbamoyl phosphate to the N(epsilon) atom of ornithine to produce L-citrulline (EC 2.1.3.3). | Cell surface:<br>Binds fibronectin ( <i>Staphylococcus epidermidis</i> ).                                                                                       | 11 | 2  | [20]         |
| <b>BCAL2777</b> | N-acetylmuramoyl-L-alanine amidase                             | Periplasm:<br>Autolysin that hydrolyzes the amide bond between N-acetylmuramoyl and L-amino acids in certain cell wall glycopeptides (EC 3.5.1.28).                       | Extracellular:<br>Fibrinogen and fibronectin binding ( <i>S. aureus</i> ).                                                                                      | 18 | 6  | [21]         |
| <b>BCAL2839</b> | Fructose-1,6-bisphosphate aldolase (CbbA)                      | Cytoplasm:<br>Glycolysis and gluconeogenesis (EC 4.1.2.13).                                                                                                               | Cell surface:<br>Adhesion to host ( <i>N. meningitidis</i> ). Binds to host Flamingo cadherin receptor (FCR) ( <i>S. pneumoniae</i> ).                          | 30 | 7  | [22][23]     |
| <b>BCAL2841</b> | Phosphoglycerate kinase                                        | Cytoplasm:<br>Phosphoglycerate kinase (EC 2.7.2.3).                                                                                                                       | Cell surface:<br>Plasminogen binding ( <i>S. anginosus</i> , <i>S. oralis</i> , <i>S. pneumoniae</i> ). Cell surface virulence factor ( <i>A. hydrophila</i> ). | 60 | 11 | [16][24][25] |
| <b>BCAL3004</b> | Chorismate mutase                                              | Periplasm:<br>Key enzyme in the shikimate pathway (EC 5.4.99.5).                                                                                                          | Extracellular:<br>Involved in virulence, being important in bacterium-rice interactions ( <i>Xanthomonas oryzae</i> ).                                          | 8  | 3  | [26]         |

---

|                 |                                                           |                                                                                                                                                          |                                                                                                                                                                                  |     |    |      |
|-----------------|-----------------------------------------------------------|----------------------------------------------------------------------------------------------------------------------------------------------------------|----------------------------------------------------------------------------------------------------------------------------------------------------------------------------------|-----|----|------|
| <b>BCAL3146</b> | Chaperonin GroEL                                          | Cytoplasm:<br>Prevents misfolding and promotes the refolding and proper assembly of unfolded polypeptides generated under stress conditions.             | Extracellular:<br>Adhesion to host ( <i>Salmonella typhimurium</i> ).                                                                                                            | 241 | 27 | [27] |
| <b>BCAL3270</b> | Molecular chaperone DnaK                                  | Cytoplasm:<br>Chaperone                                                                                                                                  | Cell surface:<br>Binds plasminogen ( <i>N. meningitidis</i> ).                                                                                                                   | 23  | 6  | [8]  |
| <b>BCAL3272</b> | Heat shock protein GrpE                                   | Cytoplasm:<br>Part of the HSP70 chaperone complex (GrpE, DnaJ, and DnaK), which is important for protein folding and helps to protect cells from stress. | Cell surface:<br>Interaction with Salivary Proline-rich Proteins of Pharyngeal Epithelial Cell ( <i>Streptococcus pyogenes</i> )                                                 | 11  | 4  | [28] |
| <b>BCAL3388</b> | Glyceraldehyde-3-phosphate (G-3-P) dehydrogenase 1 (GapA) | Cytoplasm:<br>Glycolytic enzyme that catalyses the conversion of G-3-P to 1, 3-bisphosphoglycerate (EC 1.2.1.-).                                         | Cell surface:<br>Binds plasminogen and Fibrinogen ( <i>Escherichia coli</i> ; <i>Francisella tularensis</i> ; ).<br>Binds fibronectin ( <i>F. tularensis</i> )                   | 84  | 13 | [29] |
| <b>BCAL3453</b> | Preprotein translocase subunit SecA                       | Cytoplasm:<br>Part of the Sec protein translocase complex.                                                                                               | Cell surface:<br>Binds salivary mucin ( <i>S. gordonii</i> )                                                                                                                     | 22  | 6  | [5]  |
| <b>BCAM0941</b> | 6-phosphogluconate dehydrogenase (6PGD)                   | Cytoplasm:<br>Produces NADPH by converting 6-phosphogluconate to ribulose 5-phosphate in the pentose phosphate pathway (EC 1.1.1.44).                    | Cell surface:<br>Adhesin ( <i>S. pneumoniae</i> ).                                                                                                                               | 76  | 7  | [30] |
| <b>BCAM0965</b> | Malate dehydrogenase                                      | Cytoplasm:<br>Tricarboxylic acid cycle (TCA) (EC 1.1.1.37).                                                                                              | Cell surface:<br>Binds fibronectin and plasminogen ( <i>Brucella abortus</i> ).                                                                                                  | 88  | 16 | [31] |
| <b>BCAM1309</b> | $\gamma$ -glutamyltransferase precursor 2 (Ggt2)          | Periplasm:<br>Converts glutamine into glutamate and ammonia, and converts glutathione into glutamate and cysteinylglycine (EC 2.3.2.2).                  | Extracellular:<br>Causes glutamine and glutathione consumption in the host cells. Inhibition of T cell-mediated immunity and dendritic cell differentiation ( <i>H. pylori</i> ) | 66  | 17 | [32] |
| <b>BCAM2821</b> | Malate synthase G (GlcB)                                  | Cytoplasm:<br>Malate synthase, glyoxylate cycle (EC 2.3.3.9).                                                                                            | Cell surface:<br>Binds fibronectin, laminin and A549 lung epithelial cells ( <i>M. tuberculosis</i> ).                                                                           | 9   | 4  | [12] |

<sup>1</sup>Peptides identified using surface-shaving with trypsin and LC-MS/MS analysis.

<sup>2</sup>"Moonlight proteins" in other bacteria with secondary function at the Outer membrane or Extracellular. Information retrieved from Database MoonProt 3.0 and MultitaskProtDBII.

\* In-paralogs.

## References

1. Kinoshita H, Uchida H, Kawai Y, et al. Cell surface *Lactobacillus plantarum* LA 318 glyceraldehyde-3-phosphate dehydrogenase (GAPDH) adheres to human colonic mucin. *J Appl Microbiol.* **2008**;104(6):1667-1674. doi:10.1111/j.1365-2672.2007.03679.x
2. Granato D, Bergonzelli GE, Pridmore RD, Marvin L, Rouvet M, Corthésy-Theulaz IE. Cell Surface-Associated Elongation Factor Tu Mediates the Attachment of *Lactobacillus johnsonii* NCC533 (La1) to Human Intestinal Cells and Mucins. *Infect Immun.* **2004**;72(4):2160-2169. doi:10.1128/IAI.72.4.2160-2169.2004
3. Dallo SF, Kannan TR, Blaylock MW, Baseman JB. Elongation factor Tu and E1  $\beta$  subunit of pyruvate dehydrogenase complex act as fibronectin binding proteins in *Mycoplasma pneumoniae*. *Mol Microbiol.* **2002**;46(4):1041-1051. doi:10.1046/j.1365-2958.2002.03207.x
4. Kunert A, Losse J, Gruszyn C, et al. Immune Evasion of the Human Pathogen *Pseudomonas aeruginosa*: Elongation Factor Tuf Is a Factor H and Plasminogen Binding Protein. *J Immunol.* **2007**;179(5):2979-2988. doi:10.4049/jimmunol.179.5.2979
5. Kesimer M, Kiliç N, Mehrotra R, Thornton DJ, Sheehan JK. Identification of salivary mucin MUC7 binding proteins from *Streptococcus gordonii*. *BMC Microbiol.* **2009**;9(1):163. doi:10.1186/1471-2180-9-163
6. Candela M, Bergmann S, Vici M, et al. Binding of human plasminogen to *Bifidobacterium*. *J Bacteriol.* **2007**;189(16):5929-5936. doi:10.1128/JB.00159-07
7. Hoy B, Löwer M, Weydig C, et al. *Helicobacter pylori* HtrA is a new secreted virulence factor that cleaves E-cadherin to disrupt intercellular adhesion. *EMBO Rep.* **2010**;11(10):798-804. doi:10.1038/embor.2010.114
8. Knaust A, Weber MVR, Hammerschmidt S, Bergmann S, Frosch M, Kurzai O. Cytosolic Proteins Contribute to Surface Plasminogen Recruitment of *Neisseria meningitidis*. *J Bacteriol.* **2007**;189(8):3246-3255. doi:10.1128/JB.01966-06
9. Kędzierska-Mieszkowska S, Zolkiewski M. Hsp100 Molecular Chaperone ClpB and Its Role in Virulence of Bacterial Pathogens. *Int J Mol Sci.* **2021**;22(10):5319. doi:10.3390/ijms22105319
10. Kainulainen V, Loimaranta V, Pekkala A, et al. Glutamine Synthetase and Glucose-6-Phosphate Isomerase Are Adhesive Moonlighting Proteins of *Lactobacillus crispatus* Released by Epithelial Cathelicidin LL-37. *J Bacteriol.* **2012**;194(10):2509-2519. doi:10.1128/JB.06704-11
11. Agarwal V, Kuchipudi A, Fulde M, Riesbeck K, Bergmann S, Blom AM. *Streptococcus pneumoniae* Endopeptidase O (PepO) Is a Multifunctional Plasminogen- and Fibronectin-binding Protein, Facilitating Evasion of Innate Immunity and Invasion of Host Cells. *J Biol Chem.* **2013**;288(10):6849-6863. doi:10.1074/jbc.M112.405530
12. Kinkhkar AG, Vargas D, Li H, et al. *Mycobacterium tuberculosis* malate synthase is a laminin-binding adhesin. *Mol Microbiol.* **2006**;60(4):999-1013. doi:10.1111/j.1365-2958.2006.05151.x
13. Henderson B, Martin A. Bacterial Virulence in the Moonlight: Multitasking Bacterial Moonlighting Proteins Are Virulence Determinants in Infectious Disease. *Infect Immun.* **2011**;79(9):3476-3491. doi:10.1128/IAI.00179-11
14. Sha J, Erova TE, Alyea RA, et al. Surface-Expressed Enolase Contributes to the Pathogenesis of Clinical Isolate SSU of *Aeromonas hydrophila*. *J Bacteriol.* **2009**;191(9):3095-3107. doi:10.1128/JB.00005-09
15. Xolalpa W, Vallecillo AJ, Lara M, et al. Identification of novel bacterial plasminogen-binding proteins in the human pathogen *Mycobacterium tuberculosis*. *Proteomics.* **2007**;7(18):3332-3341. doi:10.1002/pmic.200600876
16. Kinnby B, Booth NA, Svensäter G. Plasminogen binding by oral streptococci from dental plaque and inflammatory lesions. *Microbiology.* **2008**;154(3):924-931. doi:10.1099/mic.0.2007/013235-0
17. Yamaguchi M, Ikeda R, Nishimura M, Kawamoto S. Localization by scanning immunoelectron microscopy of triosephosphate isomerase, the molecules responsible for contact-mediated killing of *Cryptococcus*, on the surface of *Staphylococcus*. *Microbiol Immunol.* **2010**;54(6):368-370. doi:10.1111/j.1348-0421.2010.00225.x
18. Nishiyama K, Takaki T, Sugiyama M, et al. Extracellular Vesicles Produced by *Bifidobacterium longum* Export Mucin-Binding Proteins. *Appl Environ Microbiol.* **2020**;86(19). doi:10.1128/AEM.01464-20

19. Reddy VM, Suleman FG. *Mycobacterium avium*-superoxide dismutase binds to epithelial cell aldolase, glyceraldehyde-3-phosphate dehydrogenase and cyclophilin A. *Microb Pathog.* **2004**;36(2):67-74. doi:10.1016/j.micpath.2003.09.005
20. Hussain M, Peters G, Chhatwal GS, Herrmann M. A Lithium Chloride-Extracted, Broad-Spectrum-Adhesive 42-Kilodalton Protein of *Staphylococcus epidermidis* Is Ornithine Carbamoyltransferase. *Infect Immun.* **1999**;67(12):6688-6690. doi:10.1128/IAI.67.12.6688-6690.1999
21. Heilmann C, Hartleib J, Hussain MS, Peters G. The Multifunctional *Staphylococcus aureus* Autolysin Aaa Mediates Adherence to Immobilized Fibrinogen and Fibronectin. *Infect Immun.* **2005**;73(8):4793-4802. doi:10.1128/IAI.73.8.4793-4802.2005
22. Tunio SA, Oldfield NJ, Berry A, Ala'Aldeen DAA, Wooldridge KG, Turner DPJ. The moonlighting protein fructose-1, 6-bisphosphate aldolase of *Neisseria meningitidis*: surface localization and role in host cell adhesion. *Mol Microbiol.* **2010**;76(3):605-615. doi:10.1111/j.1365-2958.2010.07098.x
23. Blau K, Portnoi M, Shagan M, et al. Flamingo Cadherin: A Putative Host Receptor for *Streptococcus pneumoniae*. *J Infect Dis.* **2007**;195(12):1828-1837. doi:10.1086/518038
24. Fulde M, Bernardo-García N, Rohde M, et al. *Pneumococcal* phosphoglycerate kinase interacts with plasminogen and its tissue activator. *Thromb Haemost.* **2014**;112(03):401-416. doi:10.1160/TH13-05-0421
25. Henderson B, Martin A. Bacterial Moonlighting Proteins and Bacterial Virulence. In ; 2011:155-213. doi:10.1007/82\_2011\_188
26. Degrassi G, Devescovi G, Bigirimana J, Venturi V. *Xanthomonas oryzae* pv. *oryzae* XKK.12 Contains an AroQ  $\gamma$  Chorismate Mutase That Is Involved in Rice Virulence. *Phytopathology®.* **2010**;100(3):262-270. doi:10.1094/PHYTO-100-3-0262
27. Ensgraber M, Loos M. A 66-kilodalton heat shock protein of *Salmonella typhimurium* is responsible for binding of the bacterium to intestinal mucus. *Infect Immun.* **1992**;60(8):3072-3078. doi:10.1128/iai.60.8.3072-3078.1992
28. Murakami J, Terao Y, Morisaki I, Hamada S, Kawabata S. Group A *Streptococcus* Adheres to Pharyngeal Epithelial Cells with Salivary Proline-rich Proteins via GrpE Chaperone Protein. *J Biol Chem.* **2012**;287(26):22266-22275. doi:10.1074/jbc.M112.350082
29. Kopeckova M, Pavkova I, Stulik J. Diverse Localization and Protein Binding Abilities of Glyceraldehyde-3-Phosphate Dehydrogenase in Pathogenic Bacteria: The Key to its Multifunctionality? *Front Cell Infect Microbiol.* **2020**;10. doi:10.3389/fcimb.2020.00089
30. Amblee V, Jeffery CJ. Physical Features of Intracellular Proteins that Moonlight on the Cell Surface. *PLoS One.* **2015**;10(6):e0130575. doi:10.1371/journal.pone.0130575
31. Han X, Tong Y, Tian M, et al. Characterization of the immunogenicity and pathogenicity of malate dehydrogenase in *Brucella abortus*. *World J Microbiol Biotechnol.* **2014**;30(7):2063-2070. doi:10.1007/s11274-014-1631-2
32. Ricci V. *Helicobacter pylori* gamma-glutamyl transpeptidase and its pathogenic role. *World J Gastroenterol.* **2014**;20(3):630. doi:10.3748/wjg.v20.i3.630

**Table S6** – Predicted surface-exposed proteins identified in *B. cenocepacia* J2315 by using the “surface shaving” strategy followed by LC-MS/MS (Threshold score: ≥2 peptides) and their predicted B cell epitopes. HP – hypothetical protein.

| ORF<br>(Description)                                          | Peptides identified <sup>1</sup>                                                                                                                                                                              |                                                                                                                                       |                                                                                                                                                                                                                                                                                                                                                                                                                                                                                                                                                                                                                                                                                                            | B cell epitopes<br>average <sup>2</sup> | Predicted B cell epitopes <sup>2,3</sup>                                                                                                                                                                                                                                                                                                                                                                                  |
|---------------------------------------------------------------|---------------------------------------------------------------------------------------------------------------------------------------------------------------------------------------------------------------|---------------------------------------------------------------------------------------------------------------------------------------|------------------------------------------------------------------------------------------------------------------------------------------------------------------------------------------------------------------------------------------------------------------------------------------------------------------------------------------------------------------------------------------------------------------------------------------------------------------------------------------------------------------------------------------------------------------------------------------------------------------------------------------------------------------------------------------------------------|-----------------------------------------|---------------------------------------------------------------------------------------------------------------------------------------------------------------------------------------------------------------------------------------------------------------------------------------------------------------------------------------------------------------------------------------------------------------------------|
|                                                               | Aerobic conditions                                                                                                                                                                                            | Microaerophilic condition                                                                                                             | Both conditions                                                                                                                                                                                                                                                                                                                                                                                                                                                                                                                                                                                                                                                                                            |                                         |                                                                                                                                                                                                                                                                                                                                                                                                                           |
| BCAL0076<br>(Putative lipoprotein)                            |                                                                                                                                                                                                               |                                                                                                                                       | <sup>86</sup> QEANDMSAQHNGGLSGDEQR <sup>105</sup><br><sup>106</sup> VLNQELDTAAR <sup>116</sup>                                                                                                                                                                                                                                                                                                                                                                                                                                                                                                                                                                                                             | 0.510                                   | <sup>85</sup> RQEANDMSAQHNGGLSGDEQRL<br>NQ <sup>109</sup>                                                                                                                                                                                                                                                                                                                                                                 |
| BCAL0151<br>(Extracellular ligand binding protein)            | <sup>33</sup> IGHVAPLTGGIAHLGK <sup>48</sup><br><sup>96</sup> LVDDKVVAVVGHLNSGTSIP<br>ASK <sup>118</sup><br><sup>199</sup> VMSHDATNDKAVD<br>FR <sup>213</sup><br><sup>355</sup> GDLQHGVISLYNYK <sup>368</sup> |                                                                                                                                       | <sup>56</sup> LAVEEINAK <sup>64</sup><br><sup>73</sup> ITLQLDPQDDAADPR <sup>87</sup><br><sup>73</sup> ITLQLDPQDDAADPRQATQVAQK <sup>95</sup><br><sup>101</sup> VVAVVGHLNSGTSIPASK <sup>118</sup><br><sup>119</sup> IYSDAGVVQISPSATNPAYTQQGFK <sup>143</sup><br><sup>148</sup> VVATDAQQGPALADYAHSK <sup>166</sup><br><sup>170</sup> SVAVVDDS <sup>177</sup><br><sup>170</sup> SVAVVDDSTAYGQGLANEFEK <sup>190</sup><br><sup>219</sup> IKGENPDAIMYGGMDATGGPFAK <sup>241</sup><br><sup>286</sup> MPGGAAFK <sup>293</sup><br><sup>325</sup> ANSTDPAKILAAMPATK <sup>341</sup><br><sup>333</sup> ILAAMPATK <sup>341</sup><br><sup>342</sup> YTGVI GTTTFDSK <sup>354</sup><br><sup>373</sup> SLLDEVK <sup>379</sup> | 0.439                                   | <sup>64</sup> KGLTIGGQK <sup>72</sup><br><sup>82</sup> DAADPRQATQV <sup>92</sup><br><sup>136</sup> AYTQQG <sup>141</sup><br><sup>202</sup> HDATNDKAVD <sup>211</sup><br><sup>262</sup> KLADLAGD <sup>269</sup><br><sup>282</sup> SLEKMPGG <sup>289</sup><br><sup>297</sup> EKRFGQP <sup>303</sup><br><sup>326</sup> NSTDPAK <sup>332</sup><br><sup>353</sup> SKGDLQ <sup>358</sup><br><sup>372</sup> KSLLD <sup>376</sup> |
| BCAL0304<br>(VacJ-like lipoprotein)                           | <sup>195</sup> ANLLGAGDVLDAALDK <sup>211</sup>                                                                                                                                                                |                                                                                                                                       | <sup>232</sup> GEAAVTSNNDALPK <sup>245</sup>                                                                                                                                                                                                                                                                                                                                                                                                                                                                                                                                                                                                                                                               | 0.469                                   | <sup>27</sup> VQTPTKGDPLE <sup>37</sup><br><sup>125</sup> KLPKHTADF <sup>133</sup><br><sup>175</sup> YVKPDG <sup>180</sup><br><sup>194</sup> RANLLGAGDV <sup>203</sup>                                                                                                                                                                                                                                                    |
| BCAL0343<br>(Putative type VI secretion system protein -TssD) |                                                                                                                                                                                                               | <sup>30</sup> SWDHSIVQPR <sup>39</sup><br><sup>99</sup> VQYLEVK <sup>105</sup><br><sup>144</sup> IGGNQGGNTQGAWSL<br>TK <sup>160</sup> | <sup>40</sup> SATASTAGGHTMTR <sup>53</sup>                                                                                                                                                                                                                                                                                                                                                                                                                                                                                                                                                                                                                                                                 | 0.503                                   | <sup>13</sup> VKGESADKDHQ <sup>23</sup><br><sup>31</sup> WDHSIVQPRSATASTAGGHTMTR<br>C <sup>54</sup><br><sup>92</sup> ADGEGKRV <sup>99</sup><br><sup>116</sup> PSVREEGLP <sup>124</sup>                                                                                                                                                                                                                                    |
| BCAL0349                                                      | <sup>195</sup> VSASEQGVLDQTLAN                                                                                                                                                                                |                                                                                                                                       |                                                                                                                                                                                                                                                                                                                                                                                                                                                                                                                                                                                                                                                                                                            | 0.516                                   | <sup>5</sup> IQVRRAR <sup>11</sup>                                                                                                                                                                                                                                                                                                                                                                                        |



|                                                               |                                                              |                                                                                                                                     |                                                |       |                                                                                                                                                                                                                                                                                                                                     |
|---------------------------------------------------------------|--------------------------------------------------------------|-------------------------------------------------------------------------------------------------------------------------------------|------------------------------------------------|-------|-------------------------------------------------------------------------------------------------------------------------------------------------------------------------------------------------------------------------------------------------------------------------------------------------------------------------------------|
| (Type VI secretion system-associated protein TagL)            | R <sup>210</sup><br><sup>257</sup> TSNIALSQAR <sup>266</sup> |                                                                                                                                     |                                                |       | <sup>40</sup> GATVTPVGN <sup>48</sup><br><sup>184</sup> NPTYTIKNGLRV <b>VSASEQGVL</b> <sup>203</sup><br><sup>213</sup> EFETGSATLTPQ <sup>224</sup><br><sup>251</sup> DNSGNRT <b>SNIAL</b> <sup>262</sup><br><sup>290</sup> GPDQPIAPNDTADGRARN <sup>307</sup>                                                                        |
| BCAL0360<br>(HP)                                              |                                                              | <sup>48</sup> DNAPLDER <sup>55</sup><br><sup>72</sup> AANHQVIGTSETYSSVQ<br>AR <sup>90</sup>                                         | <sup>21</sup> SANGEILASER <sup>32</sup>        | 0.488 | <sup>8</sup> KKATNGQ <sup>14</sup><br><sup>31</sup> <b>ERYEEKSG</b> <sup>38</sup><br><sup>49</sup> <b>NAPLDERYERKLAHN</b> <sup>63</sup><br><sup>80</sup> <b>TSETYSSVQA</b> <sup>89</sup><br><sup>99</sup> RDAPIAET <sup>106</sup>                                                                                                   |
| BCAL0389<br>(Thiol:disulfide interchange protein - DsbC)      | <sup>224</sup> RLPGAVSADQLNQALAS<br>SK <sup>242</sup>        |                                                                                                                                     | <sup>40</sup> LGNDAPIK <sup>47</sup>           | 0.481 | <sup>24</sup> QADQTTDK <sup>31</sup><br><sup>33</sup> KATLQARLGND <b>APIKSVSKSPVA</b> <sup>55</sup><br><sup>223</sup> <b>RRLPGAVSADQL</b> <sup>234</sup>                                                                                                                                                                            |
| BCAL0562<br>(Flagellin synthesis anti-sigma-28 factor - FglM) |                                                              | <sup>22</sup> APSGTAQSSAQAGDAGSTGG<br>DTTVNLSGLSGQLR <sup>55</sup><br><sup>89</sup> IADGVLNTAR <sup>98</sup>                        | <sup>3</sup> IDSTPKPSPLAPTGNGAAR <sup>21</sup> | 0.553 | <sup>51</sup> <b>SGQLRSVSASGDADIDTG</b> <sup>68</sup><br><sup>99</sup> ELLQRQR <sup>105</sup>                                                                                                                                                                                                                                       |
| BCAL0565<br>(Flagellar basal body rod protein FlgC)           |                                                              | <sup>47</sup> QVVFATDPMGGAR <sup>59</sup><br><sup>60</sup> TASGQGVGGVR <sup>70</sup><br><sup>118</sup> SYQANVETLNTAK <sup>130</sup> |                                                | 0.485 | <sup>32</sup> ADSATGPDGKPY <sup>43</sup><br><sup>54</sup> <b>PMGGARTASGQGVGGV</b> <sup>69</sup>                                                                                                                                                                                                                                     |
| BCAL0577<br>(Flagellar hook-associated protein - FlgL)        |                                                              | <sup>108</sup> SALSTQLQGYR <sup>118</sup><br><sup>141</sup> TATAPFSNAPGGGVTYSGDT<br>GSR <sup>163</sup>                              | <sup>164</sup> EVQIADTR <sup>171</sup>         | 0.535 | <sup>17</sup> SDQQAQLSQLYQQISSGVSLATPA <sup>40</sup><br><sup>98</sup> GDGSLSDSNR <b>SA</b> <sup>109</sup><br><sup>403</sup> LSLFQ <sup>407</sup>                                                                                                                                                                                    |
| BCAL0849<br>(Metallo peptidase, subfamily M48B)               |                                                              | <sup>147</sup> AMQTAYAVSAAR <sup>158</sup><br><sup>159</sup> SAAGAASPGVAALSSSQLGDI<br>TEK <sup>182</sup>                            |                                                | 0.469 | <sup>23</sup> QSLDANSLTSAGT <sup>35</sup><br><sup>39</sup> KAATLSDS <b>D</b> <sup>47</sup><br><sup>60</sup> DAESKIAPANSAYAKR <sup>75</sup><br><sup>85</sup> DMTLNGQK <sup>92</sup><br><sup>172</sup> <b>SSSQLGDIT</b> <sup>180</sup><br><sup>206</sup> QKGMSQK <sup>212</sup><br><sup>223</sup> QMDGGQSSMMSSHPSASRAQ <sup>243</sup> |

|                                                    |                                                                                       |                                                                                                                                    |       |                                                                                                                                                                                                                                                                                                                                                                                                                                                                                                                                                                                                         |
|----------------------------------------------------|---------------------------------------------------------------------------------------|------------------------------------------------------------------------------------------------------------------------------------|-------|---------------------------------------------------------------------------------------------------------------------------------------------------------------------------------------------------------------------------------------------------------------------------------------------------------------------------------------------------------------------------------------------------------------------------------------------------------------------------------------------------------------------------------------------------------------------------------------------------------|
| BCAL1105<br>(HP)                                   |                                                                                       | <sup>37</sup> DAMGHDAMAK <sup>46</sup><br><sup>63</sup> DAMGHDAMK <sup>71</sup>                                                    | 0.504 | <sup>23</sup> QNDAMSKDGMMSKD <b>DAMGH</b> <sup>41</sup>                                                                                                                                                                                                                                                                                                                                                                                                                                                                                                                                                 |
| BCAL1390<br>(Glucanase)                            | <sup>267</sup> ADPLAAPLLAK <sup>277</sup><br><sup>365</sup> FGADGTLDTR <sup>374</sup> |                                                                                                                                    | 0.461 | <sup>17</sup> TGAADAAGAGCSVAWPRWDA <sup>36</sup><br><sup>88</sup> NNLAQGDLSAH <sup>98</sup><br><sup>107</sup> APDGAWRVLDA <sup>117</sup><br><sup>138</sup> WRERSY <sup>143</sup><br><sup>158</sup> ETATVPG <sup>164</sup><br><sup>175</sup> GFKLADG <sup>181</sup><br><sup>203</sup> PDDRR <sup>207</sup><br><sup>234</sup> YRACKGFGPDPDTHA <sup>248</sup><br><sup>267</sup> <b>ADPLA</b> <sup>271</sup><br><sup>289</sup> GAPPERVDTTTGVAGPND <sup>306</sup><br><sup>325</sup> HALADA <sup>330</sup><br><sup>332</sup> AARVDTLARQSAP <sup>344</sup><br><sup>370</sup> <b>TLDTRW</b> GDRS <sup>379</sup> |
| BCAL1848<br>(HP)                                   |                                                                                       | <sup>98</sup> APQALVVTTR <sup>107</sup><br><sup>108</sup> SAGSGGYVGAQAYVTTSR <sup>125</sup>                                        | 0.489 | <sup>21</sup> AADECGFVKKVELPSR <sup>36</sup><br><sup>45</sup> GALEPCSTGS <sup>54</sup><br><sup>60</sup> YSTAHAAPGFDTDDY <sup>74</sup><br><sup>91</sup> TADLGAR <b>AP</b> <sup>99</sup><br><sup>107</sup> <b>RSAGSGGYVG</b> <sup>116</sup><br><sup>132</sup> SVDGLAPDVD <sup>141</sup>                                                                                                                                                                                                                                                                                                                   |
| BCAL1849<br>(HP)                                   |                                                                                       | <sup>72</sup> GGGTGQLEYTVK <sup>83</sup><br><sup>88</sup> TFGNTQETR <sup>96</sup><br><sup>153</sup> GVANVQLSFQAAAPK <sup>167</sup> | 0.520 | <sup>61</sup> FAAPPVKGSLK <b>GGGTGQ</b> <sup>77</sup><br><sup>143</sup> VRLAPSVDAK <b>GVA</b> <sup>155</sup><br><sup>164</sup> <b>AAPK</b> GTRSVTAGGKSLQCPDVVS <sup>188</sup><br>VS <sup>188</sup><br><sup>198</sup> NGGSKSVTM <sup>206</sup>                                                                                                                                                                                                                                                                                                                                                           |
| BCAL1893<br>(Family M23<br>peptidase)              | <sup>201</sup> GVNIGGTAGEAVK <sup>213</sup>                                           | <sup>85</sup> IALENGQNYR <sup>94</sup><br><sup>229</sup> GYGNI <b>IIIK</b> <sup>237</sup>                                          | 0.523 | <sup>5</sup> SMLRAMQNRSREPLTLA <sup>22</sup><br><sup>191</sup> LNGFDDAK <sup>198</sup><br><sup>251</sup> ALMVKEGDAVTK <sup>262</sup><br><sup>287</sup> GKPVDPLKY <sup>295</sup>                                                                                                                                                                                                                                                                                                                                                                                                                         |
| BCAL1938<br>(Cysteine<br>peptidase, family<br>C40) | <sup>346</sup> TSTADDPIAR <sup>355</sup>                                              | <sup>324</sup> SIEPAPVQVLR <sup>334</sup>                                                                                          | 0.532 | <sup>109</sup> GRGVSIEPD <sup>117</sup><br><sup>161</sup> LTNPYWAK <sup>168</sup><br><sup>334</sup> <b>RASTQ</b> SAPVSPRT <b>STADDPIARFA</b> <sup>357</sup>                                                                                                                                                                                                                                                                                                                                                                                                                                             |

|                                              |                                                        |                                                                                                                                                                                                                                                                                                                                                                    |       |                                                                                                                                                                                                                                                           |
|----------------------------------------------|--------------------------------------------------------|--------------------------------------------------------------------------------------------------------------------------------------------------------------------------------------------------------------------------------------------------------------------------------------------------------------------------------------------------------------------|-------|-----------------------------------------------------------------------------------------------------------------------------------------------------------------------------------------------------------------------------------------------------------|
| BCAL1961<br>(HP)                             | <sup>82</sup> VAAAIATTPNVDLEK <sup>96</sup>            | <sup>43</sup> FDDIADIGK <sup>51</sup>                                                                                                                                                                                                                                                                                                                              | 0.472 | <sup>58</sup> LDPNTLAPNG <sup>67</sup>                                                                                                                                                                                                                    |
|                                              | <sup>174</sup> GNHASTVTLLLDQGADPQV<br>K <sup>193</sup> | <sup>58</sup> LDPNTLAPNGDPILVIAAR <sup>76</sup><br><sup>82</sup> VAAAIATTPNVDLEKEDK <sup>99</sup><br><sup>131</sup> GWAPLHYAATNGQDAVVK <sup>148</sup><br><sup>194</sup> NQLGITALEFAK <sup>205</sup><br><sup>206</sup> HYNAPDAIEILSK <sup>218</sup><br><sup>223</sup> IGASTPADAQK <sup>233</sup>                                                                    |       | <sup>92</sup> VDLEKEDKAG <sup>101</sup><br><sup>125</sup> AEVSKKG <sup>131</sup><br><sup>155</sup> AYIDTASPNI <sup>163</sup><br><sup>187</sup> GADPQVKNQLGIT <sup>199</sup><br><sup>219</sup> RTTRIGASTPADAQK <sup>233</sup>                              |
| BCAL1985<br>(Putative exported<br>isomerase) |                                                        | <sup>68</sup> EILMQEAIR <sup>76</sup><br><sup>77</sup> EGIPNRPDVK <sup>86</sup><br><sup>87</sup> AQVAVAQQTVVLR <sup>99</sup><br><sup>186</sup> AYVPEFAAAAQK <sup>197</sup><br><sup>235</sup> AQIAQQLVQQK <sup>245</sup><br><sup>246</sup> LQAFEELR <sup>254</sup>                                                                                                  | 0.494 | <sup>45</sup> LVQQGQTDGPQLQQAVRQELVN<br>RE <sup>68</sup><br><sup>78</sup> GIPNRPD <sup>84</sup><br><sup>198</sup> LQKGQMTDT <sup>206</sup><br><sup>221</sup> DIRDIAPPPF <sup>230</sup><br><sup>240</sup> QLVQQKLQAFEEL <sup>252</sup>                     |
|                                              |                                                        | <sup>13</sup> GLLNDAADSVQDPSR <sup>27</sup><br><sup>35</sup> ELDDSIGR <sup>42</sup><br><sup>78</sup> ALQGGDEALAR <sup>88</sup><br><sup>150</sup> DVAASALGGIGGK <sup>162</sup><br><sup>163</sup> NLSEDFQK <sup>170</sup>                                                                                                                                            |       | <sup>20</sup> DSVQDPSRD <sup>28</sup><br><sup>156</sup> LGGIGGKNLSEDFQKLEDK <sup>174</sup><br><sup>215</sup> AALKKQLD <sup>222</sup>                                                                                                                      |
| BCAL2022<br>(PspA/IM30 family<br>protein)    |                                                        |                                                                                                                                                                                                                                                                                                                                                                    | 0.503 |                                                                                                                                                                                                                                                           |
|                                              |                                                        |                                                                                                                                                                                                                                                                                                                                                                    |       |                                                                                                                                                                                                                                                           |
| BCAL2229<br>(HP)                             | <sup>110</sup> WFAAAGLR <sup>117</sup>                 | <sup>46</sup> EVVSTMPTGK <sup>55</sup>                                                                                                                                                                                                                                                                                                                             | 0.427 | <sup>6</sup> SLGRT <sup>10</sup>                                                                                                                                                                                                                          |
|                                              | <sup>311</sup> SPHGIYFYDR <sup>320</sup>               | <sup>121</sup> VDIYGYDGR <sup>129</sup><br><sup>137</sup> VPLAVMPSHLAFTK <sup>150</sup><br><sup>184</sup> VPAGLWLTPDDK <sup>195</sup><br><sup>232</sup> SLADGTHVAVTNR <sup>244</sup><br><sup>291</sup> KVGIIDLASR <sup>300</sup><br><sup>292</sup> VGIIDLASR <sup>300</sup><br><sup>301</sup> KLVQTIAVGR <sup>310</sup><br><sup>302</sup> LVQTIAVGR <sup>310</sup> |       | <sup>87</sup> GKLQRTVE <sup>94</sup><br><sup>130</sup> DLKLVKRVPLA <sup>140</sup><br><sup>174</sup> TVKWKMK <sup>180</sup><br><sup>215</sup> QKVVKQIY <sup>222</sup><br><sup>257</sup> LTNVGDITGLLP <sup>268</sup><br><sup>300</sup> RKLVQ <sup>304</sup> |
| BCAL2413<br>(HP)                             |                                                        | <sup>70</sup> QMLFVDTVSASGAR <sup>83</sup>                                                                                                                                                                                                                                                                                                                         | 0.474 | <sup>22</sup> AQLTVEEIDADARQQ <sup>36</sup>                                                                                                                                                                                                               |
|                                              |                                                        | <sup>97</sup> EATLRDEIADPK <sup>108</sup><br><sup>102</sup> DEIADPK <sup>108</sup>                                                                                                                                                                                                                                                                                 |       | <sup>79</sup> ASGARYQAGRYTWWTKGKEA <sup>98</sup><br><sup>101</sup> RDEIADPKSPP <sup>111</sup><br><sup>119</sup> VEKKK <sup>123</sup>                                                                                                                      |
| BCAL2476<br>(HP)                             | <sup>5</sup> YYTSLDLSTGK <sup>15</sup>                 | <sup>38</sup> SYITELLSK <sup>46</sup>                                                                                                                                                                                                                                                                                                                              | 0.526 | <sup>61</sup> SNGKPAECRERKFIIDD <sup>77</sup>                                                                                                                                                                                                             |
|                                              | <sup>16</sup> DLNSLDMFSSNGK <sup>28</sup>              | <sup>72</sup> KFIIDNLIK <sup>80</sup>                                                                                                                                                                                                                                                                                                                              |       | <sup>86</sup> NSFSSC <sup>91</sup>                                                                                                                                                                                                                        |

|                                                                 |                                                                                     |                                                                                                                                                                                                                                                                                                                                                                                                                      |       |                                                                                                                                                                                                                                                                                                                                                                 |
|-----------------------------------------------------------------|-------------------------------------------------------------------------------------|----------------------------------------------------------------------------------------------------------------------------------------------------------------------------------------------------------------------------------------------------------------------------------------------------------------------------------------------------------------------------------------------------------------------|-------|-----------------------------------------------------------------------------------------------------------------------------------------------------------------------------------------------------------------------------------------------------------------------------------------------------------------------------------------------------------------|
| BCAL2645<br>(Putative OmpA family protein)                      | <sup>79</sup> LAPSAAQGTGTQVTEQPDGS<br>LK <sup>99</sup>                              | <sup>161</sup> AQSVVNALVQR <sup>171</sup><br><sup>178</sup> LSAQGMGASNPIADNATEAGR <sup>198</sup>                                                                                                                                                                                                                                                                                                                     | 0.502 | <sup>88</sup> TQVTEQ <sup>93</sup><br><sup>109</sup> ATNQYAITPA <sup>118</sup><br><sup>145</sup> DSTGSAQLNQTL <sup>156</sup><br><sup>183</sup> MGASNPIADNATEAGRAQN <sup>201</sup>                                                                                                                                                                               |
| BCAL2820<br>(RND-4 efflux system outer membrane protein - oprM) | <sup>89</sup> VSVLNIEAAR <sup>98</sup><br><sup>123</sup> LPNSLTAVPGR <sup>133</sup> | <sup>401</sup> GTYDQQIAALER <sup>412</sup>                                                                                                                                                                                                                                                                                                                                                                           | 0.519 | <sup>152</sup> FGRVQSLKDQAL <sup>163</sup><br><sup>167</sup> LSTSY <sup>172</sup><br><sup>241</sup> ANQQAQARARAQ <sup>252</sup><br><sup>297</sup> PDVMQAEQ <sup>304</sup><br><sup>314</sup> GAARAAFFPK <sup>323</sup><br><sup>329</sup> AFGTASPTLGGLFKAGTA <sup>346</sup><br><sup>446</sup> YAAQQ <sup>450</sup>                                                |
| BCAL2958<br>(Putative ompA family protein)                      | <sup>123</sup> IEGMNTEVVVATGYTDR <sup>139</sup>                                     | <sup>56</sup> DAFWTPATANAK <sup>67</sup><br><sup>93</sup> ITYQADALFDFDK <sup>105</sup><br><sup>106</sup> ATLKPLGK <sup>113</sup><br><sup>114</sup> QKDELASK <sup>122</sup><br><sup>116</sup> LDELASK <sup>122</sup><br><sup>123</sup> IEGMNTEVVVATGYTDR <sup>139</sup> *<br><sup>140</sup> IGSDKYNDR <sup>148</sup><br><sup>203</sup> RVEVEVVGTTQQVQK <sup>216</sup><br><sup>204</sup> VEVEVVGTTQQVQK <sup>216</sup> | 0.512 | <sup>101</sup> DFFDKATLKPLGKQ <sup>114</sup><br><sup>139</sup> RIGSDKYNDRL <sup>149</sup><br><sup>211</sup> TQQVQKTTV <sup>219</sup>                                                                                                                                                                                                                            |
| BCAL3149<br>(HP)                                                |                                                                                     | <sup>43</sup> DGEHTEIR <sup>50</sup><br><sup>61</sup> MDFVSPHR <sup>68</sup><br><sup>69</sup> GAVLAYDPGDGK <sup>80</sup><br><sup>122</sup> NVHALQQGGATVTEGEEAVGGR <sup>143</sup>                                                                                                                                                                                                                                     | 0.483 | <sup>11</sup> IGASMTADPV <sup>20</sup><br><sup>40</sup> SARDGEH <sup>46</sup><br><sup>101</sup> PLVRDRTGHRVDRSDVG <sup>117</sup><br><sup>124</sup> HALQQGGATVTEGEEAVGG <sup>142</sup><br><sup>152</sup> GAPAHAVDGV <sup>161</sup><br><sup>180</sup> SYASDDDT <sup>187</sup>                                                                                     |
| BCAL3203<br>(Tol-Pal system protein - TolB)                     |                                                                                     | <sup>96</sup> GANAFVAGSVNR <sup>107</sup><br><sup>176</sup> YQLQISDSGQNAR <sup>189</sup><br><sup>210</sup> VAYVSFER <sup>217</sup><br><sup>326</sup> VTFTGSYNTSPR <sup>337</sup>                                                                                                                                                                                                                                     | 0.454 | <sup>47</sup> FTNEANLPQQVTS <sup>59</sup><br><sup>123</sup> VKQQSLG <sup>129</sup><br><sup>150</sup> YIYQKLLGVRGVF <sup>162</sup><br><sup>185</sup> GQNARIA <sup>191</sup><br><sup>229</sup> TGRRYMVSDQKG <sup>240</sup><br><sup>274</sup> GGLRRLTQS <sup>282</sup><br><sup>316</sup> QGESAGAAQRV <sup>326</sup><br><sup>364</sup> TGAANAITNTNRD <sup>376</sup> |

|                                                   |  |  |  |  |  |  |  |  |  |  |  |  |  |  |  |  |  |  |  |  |  |  |  |  |  |  |  |  |  |  |  |  |  |  |  |  |  |  |  |  |  |  |  |  |  |  |  |  |  |  |  |  |  |  |  |  |  |  |  |  |  |  |  |  |  |  |  |  |  |  |  |  |  |  |  |  |  |  |  |  |  |  |  |  |  |  |  |  |  |  |  |  |  |  |  |  |  |  |  |  |  |  |  |  |  |  |  |  |  |  |  |  |  |  |  |  |  |  |  |  |  |  |  |  |  |  |  |  |  |  |  |  |  |  |  |  |  |  |  |  |  |  |  |  |  |  |  |  |  |  |  |  |  |  |  |  |  |  |  |  |  |  |  |  |  |  |  |  |  |  |  |  |  |  |  |  |  |  |  |  |  |  |  |  |  |  |  |  |  |  |  |  |  |  |  |  |  |  |  |  |  |  |  |  |  |  |  |  |  |  |  |  |  |  |  |  |  |  |  |  |  |  |  |  |  |  |  |  |  |  |  |  |  |  |  |  |  |  |  |  |  |  |  |  |  |  |  |  |  |  |  |  |  |  |  |  |  |  |  |  |  |  |  |  |  |  |  |  |  |  |  |  |  |  |  |  |  |  |  |  |  |  |  |  |  |  |  |  |  |  |  |  |  |  |  |  |  |  |  |  |  |  |  |  |  |  |  |  |  |  |  |  |  |  |  |  |  |  |  |  |  |  |  |  |  |  |  |  |  |  |  |  |  |  |  |  |  |  |  |  |  |  |  |  |  |  |  |  |  |  |  |  |  |  |  |  |  |  |  |  |  |  |  |  |  |  |  |  |  |  |  |  |  |  |  |  |  |  |  |  |  |  |  |  |  |  |  |  |  |  |  |  |  |  |  |  |  |  |  |  |  |  |  |  |  |  |  |  |  |  |  |  |  |  |  |  |  |  |  |  |  |  |  |  |  |  |  |  |  |  |  |  |  |  |  |  |  |  |  |  |  |  |  |  |  |  |  |  |  |  |  |  |  |  |  |  |  |  |  |  |  |  |  |  |  |  |  |  |  |  |  |  |  |  |  |  |  |  |  |  |  |  |  |  |  |  |  |  |  |  |  |  |  |  |  |  |  |  |  |  |  |  |  |  |  |  |  |  |  |  |  |  |  |  |  |  |  |  |  |  |  |  |  |  |  |  |  |  |  |  |  |  |  |  |  |  |  |  |  |  |  |  |  |  |  |  |  |  |  |  |  |  |  |  |  |  |  |  |  |  |  |  |  |  |  |  |  |  |  |  |  |  |  |  |  |  |  |  |  |  |  |  |  |  |  |  |  |  |  |  |  |  |  |  |  |  |  |  |  |  |  |  |  |  |  |  |  |  |  |  |  |  |  |  |  |  |  |  |  |  |  |  |  |  |  |  |  |  |  |  |  |  |  |  |  |  |  |  |  |  |  |  |  |  |  |  |  |  |  |  |  |  |  |  |  |  |  |  |  |  |  |  |  |  |  |  |  |  |  |  |  |  |  |  |  |  |  |  |  |  |  |  |  |  |  |  |  |  |  |  |  |  |  |  |  |  |  |  |  |  |  |  |  |  |  |  |  |  |  |  |  |  |  |  |  |  |  |  |  |  |  |  |  |  |  |  |  |  |  |  |  |  |  |  |  |  |  |  |  |  |  |  |  |  |  |  |  |  |  |  |  |  |  |  |  |  |  |  |  |  |  |  |  |  |  |  |  |  |  |  |  |  |  |  |  |  |  |  |  |  |  |  |  |  |  |  |  |  |  |  |  |  |  |  |  |  |  |  |  |  |  |  |  |  |  |  |  |  |  |  |  |  |  |  |  |  |  |  |  |  |  |  |  |  |  |  |  |  |  |  |  |  |  |  |  |  |  |  |  |  |  |  |  |  |  |  |  |  |  |  |  |  |  |  |  |  |  |  |  |  |  |  |  |  |  |  |  |  |  |  |  |  |  |  |  |  |  |  |  |  |  |  |  |  |  |  |  |  |  |  |  |  |  |  |  |  |  |  |  |  |  |  |  |  |  |  |  |  |  |  |  |  |  |  |  |  |  |  |  |  |  |  |  |  |  |  |  |  |  |  |  |  |  |  |  |  |  |  |  |  |  |  |  |  |  |  |  |  |  |  |  |  |  |  |  |  |  |  |  |  |  |  |  |  |  |  |  |  |  |  |  |  |  |  |  |  |  |  |  |  |  |  |  |  |  |  |  |  |  |  |  |  |  |  |  |  |  |  |  |  |  |  |  |  |  |  |  |  |  |  |  |  |  |  |  |  |  |  |  |  |  |  |  |  |  |  |  |  |  |  |  |  |  |  |  |  |  |  |  |  |  |  |  |  |  |  |  |  |  |  |  |  |  |  |  |  |  |  |  |  |  |  |  |  |  |  |  |  |  |  |  |  |  |  |  |  |  |  |  |  |  |  |  |  |  |  |  |  |  |  |  |  |  |  |  |  |  |  |  |  |  |  |  |  |  |  |  |  |  |  |  |  |  |  |  |  |  |  |  |  |  |  |  |  |  |  |  |  |  |  |  |  |  |  |  |  |  |  |  |  |  |  |  |  |  |  |  |  |  |  |  |  |  |  |  |  |  |  |  |  |  |  |  |  |  |  |  |  |  |  |  |  |  |  |  |  |  |  |  |  |  |  |  |  |  |  |  |  |  |  |  |  |  |  |  |  |  |  |  |  |  |  |  |  |  |  |  |  |  |  |  |  |  |  |  |  |  |  |  |  |  |  |  |  |  |  |  |  |  |  |  |  |  |  |  |  |  |  |  |  |  |  |  |  |  |  |  |  |  |  |  |  |  |  |  |  |  |  |  |  |  |  |  |  |  |  |  |  |  |  |  |  |  |  |  |  |  |  |  |  |  |  |  |  |  |  |  |  |  |  |  |  |  |  |  |  |  |  |  |  |  |  |  |  |  |  |  |  |  |  |  |  |  |  |  |  |  |  |  |  |  |  |  |  |  |  |  |  |  |  |  |  |  |  |  |  |  |  |  |  |  |  |  |  |  |  |  |  |  |  |  |  |  |  |  |  |  |  |  |  |  |  |  |  |  |  |  |  |  |  |  |  |  |  |  |  |  |  |  |  |  |  |  |  |  |  |  |  |  |  |  |  |  |  |  |  |  |  |  |  |  |  |  |  |  |  |  |  |  |  |  |  |  |  |  |  |  |  |  |  |  |  |  |  |  |  |  |  |  |  |  |  |  |  |  |  |  |  |  |  |  |  |  |  |  |  |  |  |  |  |  |  |
|---------------------------------------------------|--|--|--|--|--|--|--|--|--|--|--|--|--|--|--|--|--|--|--|--|--|--|--|--|--|--|--|--|--|--|--|--|--|--|--|--|--|--|--|--|--|--|--|--|--|--|--|--|--|--|--|--|--|--|--|--|--|--|--|--|--|--|--|--|--|--|--|--|--|--|--|--|--|--|--|--|--|--|--|--|--|--|--|--|--|--|--|--|--|--|--|--|--|--|--|--|--|--|--|--|--|--|--|--|--|--|--|--|--|--|--|--|--|--|--|--|--|--|--|--|--|--|--|--|--|--|--|--|--|--|--|--|--|--|--|--|--|--|--|--|--|--|--|--|--|--|--|--|--|--|--|--|--|--|--|--|--|--|--|--|--|--|--|--|--|--|--|--|--|--|--|--|--|--|--|--|--|--|--|--|--|--|--|--|--|--|--|--|--|--|--|--|--|--|--|--|--|--|--|--|--|--|--|--|--|--|--|--|--|--|--|--|--|--|--|--|--|--|--|--|--|--|--|--|--|--|--|--|--|--|--|--|--|--|--|--|--|--|--|--|--|--|--|--|--|--|--|--|--|--|--|--|--|--|--|--|--|--|--|--|--|--|--|--|--|--|--|--|--|--|--|--|--|--|--|--|--|--|--|--|--|--|--|--|--|--|--|--|--|--|--|--|--|--|--|--|--|--|--|--|--|--|--|--|--|--|--|--|--|--|--|--|--|--|--|--|--|--|--|--|--|--|--|--|--|--|--|--|--|--|--|--|--|--|--|--|--|--|--|--|--|--|--|--|--|--|--|--|--|--|--|--|--|--|--|--|--|--|--|--|--|--|--|--|--|--|--|--|--|--|--|--|--|--|--|--|--|--|--|--|--|--|--|--|--|--|--|--|--|--|--|--|--|--|--|--|--|--|--|--|--|--|--|--|--|--|--|--|--|--|--|--|--|--|--|--|--|--|--|--|--|--|--|--|--|--|--|--|--|--|--|--|--|--|--|--|--|--|--|--|--|--|--|--|--|--|--|--|--|--|--|--|--|--|--|--|--|--|--|--|--|--|--|--|--|--|--|--|--|--|--|--|--|--|--|--|--|--|--|--|--|--|--|--|--|--|--|--|--|--|--|--|--|--|--|--|--|--|--|--|--|--|--|--|--|--|--|--|--|--|--|--|--|--|--|--|--|--|--|--|--|--|--|--|--|--|--|--|--|--|--|--|--|--|--|--|--|--|--|--|--|--|--|--|--|--|--|--|--|--|--|--|--|--|--|--|--|--|--|--|--|--|--|--|--|--|--|--|--|--|--|--|--|--|--|--|--|--|--|--|--|--|--|--|--|--|--|--|--|--|--|--|--|--|--|--|--|--|--|--|--|--|--|--|--|--|--|--|--|--|--|--|--|--|--|--|--|--|--|--|--|--|--|--|--|--|--|--|--|--|--|--|--|--|--|--|--|--|--|--|--|--|--|--|--|--|--|--|--|--|--|--|--|--|--|--|--|--|--|--|--|--|--|--|--|--|--|--|--|--|--|--|--|--|--|--|--|--|--|--|--|--|--|--|--|--|--|--|--|--|--|--|--|--|--|--|--|--|--|--|--|--|--|--|--|--|--|--|--|--|--|--|--|--|--|--|--|--|--|--|--|--|--|--|--|--|--|--|--|--|--|--|--|--|--|--|--|--|--|--|--|--|--|--|--|--|--|--|--|--|--|--|--|--|--|--|--|--|--|--|--|--|--|--|--|--|--|--|--|--|--|--|--|--|--|--|--|--|--|--|--|--|--|--|--|--|--|--|--|--|--|--|--|--|--|--|--|--|--|--|--|--|--|--|--|--|--|--|--|--|--|--|--|--|--|--|--|--|--|--|--|--|--|--|--|--|--|--|--|--|--|--|--|--|--|--|--|--|--|--|--|--|--|--|--|--|--|--|--|--|--|--|--|--|--|--|--|--|--|--|--|--|--|--|--|--|--|--|--|--|--|--|--|--|--|--|--|--|--|--|--|--|--|--|--|--|--|--|--|--|--|--|--|--|--|--|--|--|--|--|--|--|--|--|--|--|--|--|--|--|--|--|--|--|--|--|--|--|--|--|--|--|--|--|--|--|--|--|--|--|--|--|--|--|--|--|--|--|--|--|--|--|--|--|--|--|--|--|--|--|--|--|--|--|--|--|--|--|--|--|--|--|--|--|--|--|--|--|--|--|--|--|--|--|--|--|--|--|--|--|--|--|--|--|--|--|--|--|--|--|--|--|--|--|--|--|--|--|--|--|--|--|--|--|--|--|--|--|--|--|--|--|--|--|--|--|--|--|--|--|--|--|--|--|--|--|--|--|--|--|--|--|--|--|--|--|--|--|--|--|--|--|--|--|--|--|--|--|--|--|--|--|--|--|--|--|--|--|--|--|--|--|--|--|--|--|--|--|--|--|--|--|--|--|--|--|--|--|--|--|--|--|--|--|--|--|--|--|--|--|--|--|--|--|--|--|--|--|--|--|--|--|--|--|--|--|--|--|--|--|--|--|--|--|--|--|--|--|--|--|--|--|--|--|--|--|--|--|--|--|--|--|--|--|--|--|--|--|--|--|--|--|--|--|--|--|--|--|--|--|--|--|--|--|--|--|--|--|--|--|--|--|--|--|--|--|--|--|--|--|--|--|--|--|--|--|--|--|--|--|--|--|--|--|--|--|--|--|--|--|--|--|--|--|--|--|--|--|--|--|--|--|--|--|--|--|--|--|--|--|--|--|--|--|--|--|--|--|--|--|--|--|--|--|--|--|--|--|--|--|--|--|--|--|--|--|--|--|--|--|--|--|--|--|--|--|--|--|--|--|--|--|--|--|--|--|--|--|--|--|--|--|--|--|--|--|--|--|--|--|--|--|--|--|--|--|--|--|--|--|--|--|--|--|--|--|--|--|--|--|--|--|--|--|--|--|--|--|--|--|--|--|--|--|--|--|--|--|--|--|--|--|--|--|--|--|--|--|--|--|--|--|--|--|--|--|--|--|--|--|--|--|--|--|--|--|--|--|--|--|--|--|--|--|--|--|--|--|--|--|--|--|--|--|--|--|--|--|--|--|--|--|--|--|--|--|--|--|--|--|--|--|--|--|--|--|--|--|--|--|--|--|--|--|--|--|--|--|--|--|--|--|--|--|--|--|--|--|--|--|--|--|--|--|--|--|--|--|--|--|--|--|--|--|--|--|--|--|--|--|--|--|--|--|--|--|--|--|--|--|--|--|--|--|--|--|--|--|--|--|--|--|--|--|--|--|--|--|--|--|--|--|
| BCAL3204<br>(Putative OmpA<br>family lipoprotein) |  |  |  |  |  |  |  |  |  |  |  |  |  |  |  |  |  |  |  |  |  |  |  |  |  |  |  |  |  |  |  |  |  |  |  |  |  |  |  |  |  |  |  |  |  |  |  |  |  |  |  |  |  |  |  |  |  |  |  |  |  |  |  |  |  |  |  |  |  |  |  |  |  |  |  |  |  |  |  |  |  |  |  |  |  |  |  |  |  |  |  |  |  |  |  |  |  |  |  |  |  |  |  |  |  |  |  |  |  |  |  |  |  |  |  |  |  |  |  |  |  |  |  |  |  |  |  |  |  |  |  |  |  |  |  |  |  |  |  |  |  |  |  |  |  |  |  |  |  |  |  |  |  |  |  |  |  |  |  |  |  |  |  |  |  |  |  |  |  |  |  |  |  |  |  |  |  |  |  |  |  |  |  |  |  |  |  |  |  |  |  |  |  |  |  |  |  |  |  |  |  |  |  |  |  |  |  |  |  |  |  |  |  |  |  |  |  |  |  |  |  |  |  |  |  |  |  |  |  |  |  |  |  |  |  |  |  |  |  |  |  |  |  |  |  |  |  |  |  |  |  |  |  |  |  |  |  |  |  |  |  |  |  |  |  |  |  |  |  |  |  |  |  |  |  |  |  |  |  |  |  |  |  |  |  |  |  |  |  |  |  |  |  |  |  |  |  |  |  |  |  |  |  |  |  |  |  |  |  |  |  |  |  |  |  |  |  |  |  |  |  |  |  |  |  |  |  |  |  |  |  |  |  |  |  |  |  |  |  |  |  |  |  |  |  |  |  |  |  |  |  |  |  |  |  |  |  |  |  |  |  |  |  |  |  |  |  |  |  |  |  |  |  |  |  |  |  |  |  |  |  |  |  |  |  |  |  |  |  |  |  |  |  |  |  |  |  |  |  |  |  |  |  |  |  |  |  |  |  |  |  |  |  |  |  |  |  |  |  |  |  |  |  |  |  |  |  |  |  |  |  |  |  |  |  |  |  |  |  |  |  |  |  |  |  |  |  |  |  |  |  |  |  |  |  |  |  |  |  |  |  |  |  |  |  |  |  |  |  |  |  |  |  |  |  |  |  |  |  |  |  |  |  |  |  |  |  |  |  |  |  |  |  |  |  |  |  |  |  |  |  |  |  |  |  |  |  |  |  |  |  |  |  |  |  |  |  |  |  |  |  |  |  |  |  |  |  |  |  |  |  |  |  |  |  |  |  |  |  |  |  |  |  |  |  |  |  |  |  |  |  |  |  |  |  |  |  |  |  |  |  |  |  |  |  |  |  |  |  |  |  |  |  |  |  |  |  |  |  |  |  |  |  |  |  |  |  |  |  |  |  |  |  |  |  |  |  |  |  |  |  |  |  |  |  |  |  |  |  |  |  |  |  |  |  |  |  |  |  |  |  |  |  |  |  |  |  |  |  |  |  |  |  |  |  |  |  |  |  |  |  |  |  |  |  |  |  |  |  |  |  |  |  |  |  |  |  |  |  |  |  |  |  |  |  |  |  |  |  |  |  |  |  |  |  |  |  |  |  |  |  |  |  |  |  |  |  |  |  |  |  |  |  |  |  |  |  |  |  |  |  |  |  |  |  |  |  |  |  |  |  |  |  |  |  |  |  |  |  |  |  |  |  |  |  |  |  |  |  |  |  |  |  |  |  |  |  |  |  |  |  |  |  |  |  |  |  |  |  |  |  |  |  |  |  |  |  |  |  |  |  |  |  |  |  |  |  |  |  |  |  |  |  |  |  |  |  |  |  |  |  |  |  |  |  |  |  |  |  |  |  |  |  |  |  |  |  |  |  |  |  |  |  |  |  |  |  |  |  |  |  |  |  |  |  |  |  |  |  |  |  |  |  |  |  |  |  |  |  |  |  |  |  |  |  |  |  |  |  |  |  |  |  |  |  |  |  |  |  |  |  |  |  |  |  |  |  |  |  |  |  |  |  |  |  |  |  |  |  |  |  |  |  |  |  |  |  |  |  |  |  |  |  |  |  |  |  |  |  |  |  |  |  |  |  |  |  |  |  |  |  |  |  |  |  |  |  |  |  |  |  |  |  |  |  |  |  |  |  |  |  |  |  |  |  |  |  |  |  |  |  |  |  |  |  |  |  |  |  |  |  |  |  |  |  |  |  |  |  |  |  |  |  |  |  |  |  |  |  |  |  |  |  |  |  |  |  |  |  |  |  |  |  |  |  |  |  |  |  |  |  |  |  |  |  |  |  |  |  |  |  |  |  |  |  |  |  |  |  |  |  |  |  |  |  |  |  |  |  |  |  |  |  |  |  |  |  |  |  |  |  |  |  |  |  |  |  |  |  |  |  |  |  |  |  |  |  |  |  |  |  |  |  |  |  |  |  |  |  |  |  |  |  |  |  |  |  |  |  |  |  |  |  |  |  |  |  |  |  |  |  |  |  |  |  |  |  |  |  |  |  |  |  |  |  |  |  |  |  |  |  |  |  |  |  |  |  |  |  |  |  |  |  |  |  |  |  |  |  |  |  |  |  |  |  |  |  |  |  |  |  |  |  |  |  |  |  |  |  |  |  |  |  |  |  |  |  |  |  |  |  |  |  |  |  |  |  |  |  |  |  |  |  |  |  |  |  |  |  |  |  |  |  |  |  |  |  |  |  |  |  |  |  |  |  |  |  |  |  |  |  |  |  |  |  |  |  |  |  |  |  |  |  |  |  |  |  |  |  |  |  |  |  |  |  |  |  |  |  |  |  |  |  |  |  |  |  |  |  |  |  |  |  |  |  |  |  |  |  |  |  |  |  |  |  |  |  |  |  |  |  |  |  |  |  |  |  |  |  |  |  |  |  |  |  |  |  |  |  |  |  |  |  |  |  |  |  |  |  |  |  |  |  |  |  |  |  |  |  |  |  |  |  |  |  |  |  |  |  |  |  |  |  |  |  |  |  |  |  |  |  |  |  |  |  |  |  |  |  |  |  |  |  |  |  |  |  |  |  |  |  |  |  |  |  |  |  |  |  |  |  |  |  |  |  |  |  |  |  |  |  |  |  |  |  |  |  |  |  |  |  |  |  |  |  |  |  |  |  |  |  |  |  |  |  |  |  |  |  |  |  |  |  |  |  |  |  |  |  |  |  |  |  |  |  |  |  |  |  |  |  |  |  |  |  |  |  |  |  |  |  |  |  |  |  |  |  |  |  |  |  |  |  |  |  |  |  |  |  |  |  |  |  |  |  |  |  |  |  |  |  |  |  |  |  |  |  |  |  |  |  |  |  |  |  |  |  |  |  |  |  |  |
|---------------------------------------------------|--|--|--|--|--|--|--|--|--|--|--|--|--|--|--|--|--|--|--|--|--|--|--|--|--|--|--|--|--|--|--|--|--|--|--|--|--|--|--|--|--|--|--|--|--|--|--|--|--|--|--|--|--|--|--|--|--|--|--|--|--|--|--|--|--|--|--|--|--|--|--|--|--|--|--|--|--|--|--|--|--|--|--|--|--|--|--|--|--|--|--|--|--|--|--|--|--|--|--|--|--|--|--|--|--|--|--|--|--|--|--|--|--|--|--|--|--|--|--|--|--|--|--|--|--|--|--|--|--|--|--|--|--|--|--|--|--|--|--|--|--|--|--|--|--|--|--|--|--|--|--|--|--|--|--|--|--|--|--|--|--|--|--|--|--|--|--|--|--|--|--|--|--|--|--|--|--|--|--|--|--|--|--|--|--|--|--|--|--|--|--|--|--|--|--|--|--|--|--|--|--|--|--|--|--|--|--|--|--|--|--|--|--|--|--|--|--|--|--|--|--|--|--|--|--|--|--|--|--|--|--|--|--|--|--|--|--|--|--|--|--|--|--|--|--|--|--|--|--|--|--|--|--|--|--|--|--|--|--|--|--|--|--|--|--|--|--|--|--|--|--|--|--|--|--|--|--|--|--|--|--|--|--|--|--|--|--|--|--|--|--|--|--|--|--|--|--|--|--|--|--|--|--|--|--|--|--|--|--|--|--|--|--|--|--|--|--|--|--|--|--|--|--|--|--|--|--|--|--|--|--|--|--|--|--|--|--|--|--|--|--|--|--|--|--|--|--|--|--|--|--|--|--|--|--|--|--|--|--|--|--|--|--|--|--|--|--|--|--|--|--|--|--|--|--|--|--|--|--|--|--|--|--|--|--|--|--|--|--|--|--|--|--|--|--|--|--|--|--|--|--|--|--|--|--|--|--|--|--|--|--|--|--|--|--|--|--|--|--|--|--|--|--|--|--|--|--|--|--|--|--|--|--|--|--|--|--|--|--|--|--|--|--|--|--|--|--|--|--|--|--|--|--|--|--|--|--|--|--|--|--|--|--|--|--|--|--|--|--|--|--|--|--|--|--|--|--|--|--|--|--|--|--|--|--|--|--|--|--|--|--|--|--|--|--|--|--|--|--|--|--|--|--|--|--|--|--|--|--|--|--|--|--|--|--|--|--|--|--|--|--|--|--|--|--|--|--|--|--|--|--|--|--|--|--|--|--|--|--|--|--|--|--|--|--|--|--|--|--|--|--|--|--|--|--|--|--|--|--|--|--|--|--|--|--|--|--|--|--|--|--|--|--|--|--|--|--|--|--|--|--|--|--|--|--|--|--|--|--|--|--|--|--|--|--|--|--|--|--|--|--|--|--|--|--|--|--|--|--|--|--|--|--|--|--|--|--|--|--|--|--|--|--|--|--|--|--|--|--|--|--|--|--|--|--|--|--|--|--|--|--|--|--|--|--|--|--|--|--|--|--|--|--|--|--|--|--|--|--|--|--|--|--|--|--|--|--|--|--|--|--|--|--|--|--|--|--|--|--|--|--|--|--|--|--|--|--|--|--|--|--|--|--|--|--|--|--|--|--|--|--|--|--|--|--|--|--|--|--|--|--|--|--|--|--|--|--|--|--|--|--|--|--|--|--|--|--|--|--|--|--|--|--|--|--|--|--|--|--|--|--|--|--|--|--|--|--|--|--|--|--|--|--|--|--|--|--|--|--|--|--|--|--|--|--|--|--|--|--|--|--|--|--|--|--|--|--|--|--|--|--|--|--|--|--|--|--|--|--|--|--|--|--|--|--|--|--|--|--|--|--|--|--|--|--|--|--|--|--|--|--|--|--|--|--|--|--|--|--|--|--|--|--|--|--|--|--|--|--|--|--|--|--|--|--|--|--|--|--|--|--|--|--|--|--|--|--|--|--|--|--|--|--|--|--|--|--|--|--|--|--|--|--|--|--|--|--|--|--|--|--|--|--|--|--|--|--|--|--|--|--|--|--|--|--|--|--|--|--|--|--|--|--|--|--|--|--|--|--|--|--|--|--|--|--|--|--|--|--|--|--|--|--|--|--|--|--|--|--|--|--|--|--|--|--|--|--|--|--|--|--|--|--|--|--|--|--|--|--|--|--|--|--|--|--|--|--|--|--|--|--|--|--|--|--|--|--|--|--|--|--|--|--|--|--|--|--|--|--|--|--|--|--|--|--|--|--|--|--|--|--|--|--|--|--|--|--|--|--|--|--|--|--|--|--|--|--|--|--|--|--|--|--|--|--|--|--|--|--|--|--|--|--|--|--|--|--|--|--|--|--|--|--|--|--|--|--|--|--|--|--|--|--|--|--|--|--|--|--|--|--|--|--|--|--|--|--|--|--|--|--|--|--|--|--|--|--|--|--|--|--|--|--|--|--|--|--|--|--|--|--|--|--|--|--|--|--|--|--|--|--|--|--|--|--|--|--|--|--|--|--|--|--|--|--|--|--|--|--|--|--|--|--|--|--|--|--|--|--|--|--|--|--|--|--|--|--|--|--|--|--|--|--|--|--|--|--|--|--|--|--|--|--|--|--|--|--|--|--|--|--|--|--|--|--|--|--|--|--|--|--|--|--|--|--|--|--|--|--|--|--|--|--|--|--|--|--|--|--|--|--|--|--|--|--|--|--|--|--|--|--|--|--|--|--|--|--|--|--|--|--|--|--|--|--|--|--|--|--|--|--|--|--|--|--|--|--|--|--|--|--|--|--|--|--|--|--|--|--|--|--|--|--|--|--|--|--|--|--|--|--|--|--|--|--|--|--|--|--|--|--|--|--|--|--|--|--|--|--|--|--|--|--|--|--|--|--|--|--|--|--|--|--|--|--|--|--|--|--|--|--|--|--|--|--|--|--|--|--|--|--|--|--|--|--|--|--|--|--|--|--|--|--|--|--|--|--|--|--|--|--|--|--|--|--|--|--|--|--|--|--|--|--|--|--|--|--|--|--|--|--|--|--|--|--|--|--|--|--|--|--|--|--|--|--|--|--|--|--|--|--|--|--|--|--|--|--|--|--|--|--|--|--|--|--|--|--|--|--|--|--|--|--|--|--|--|--|--|--|--|--|--|--|--|--|--|--|--|--|--|--|--|--|--|--|--|--|--|--|--|--|--|--|--|--|--|--|--|--|--|--|--|--|--|--|--|--|--|--|--|--|--|--|--|--|--|--|--|--|--|--|--|--|--|--|--|--|--|--|--|--|--|--|--|--|--|--|--|--|--|--|--|--|--|--|--|--|--|--|--|--|--|

|                                               |                        |                         |       |                                    |
|-----------------------------------------------|------------------------|-------------------------|-------|------------------------------------|
| BCAM1576<br>(Phosphoesterase family protein)  | 62 HIVVIYAENR 71       | 104 TPLPVLPK 111        | 0.489 | 126 TAPYRLSP 133                   |
|                                               | 145ITDAQGKPLPNGV       | 134 DIDKLPNAPFR 144     |       | 146 <b>ARGP</b> SCPDANAS 157       |
|                                               | ITR160                 | 166 FYQNQMQUIAGGR177    |       | 169 RIRPV 173                      |
|                                               | 489 IPALVISPFAK 499    | 256 VEGDDPAGTR 265      |       | 180 GWVSVEGDACGPGAGDARSE 199       |
|                                               | 520 VHGLAPLDGVVLR 532  | 268 LADDSPASALDGPPK 282 |       | 208 EKTSSHG 214                    |
|                                               | 533 DNAFAAR 539        |                         |       | 225 TKTQRKNGDYSDTGKRTA 242         |
| BCAM1761<br>(Putative lipoprotein)            | 52LSGTEQSQHNGVTDIAVGSN | 91 GSGSEPAEEAMR 102     | 0.484 | 254 GIDMFRNFWYSPTAM 268            |
|                                               | SYFVTLTPSGNGSVIK87     |                         |       | 5 PDRPDDLPAADPD 16                 |
|                                               |                        |                         |       | 40 AGNAPRSAADLRIDEALRQ 58          |
|                                               |                        |                         |       | 147 <b>DAQGKPL</b> 153             |
|                                               |                        |                         |       | 181FAAWADSGGLVMGHYRNSAD            |
| BCAM1876<br>(HP)                              |                        | 41 TFGGLAAQANK 51       | 0.503 | TLR203                             |
|                                               |                        | 41 TFGGLAAQANKK 52      |       | 241 PDAHKHPHA 249                  |
|                                               |                        | 59 FKDV TAR 65          |       | 256 <b>VEGDDPAG</b> 263            |
|                                               |                        |                         |       | 273 <b>PASALDGPPKFAVD</b> 286      |
|                                               |                        |                         |       | 310 PPDPGNAAYADPADHRVMPPQ 330      |
| BCAM1920<br>(HP)                              | 1MAVTIDLGSGK11         | 13 ATLSSDSGSIR 23       | 0.520 | 470 GWWDHVAPPVGDRWG 484            |
|                                               |                        |                         |       | 500 KGFVDHTL 507                   |
|                                               |                        |                         |       | 17 GSAPSSDSAGSGAA30                |
|                                               |                        |                         |       | 38 QRPAY 42                        |
|                                               |                        |                         |       | 53 <b>SGTEQSQHNGVTD</b> 65         |
| BCAM1921<br>(Putative phage membrane protein) |                        | 240 NNPALMTDTLDASMR 254 | 0.495 | 90 <b>RSGSGSEPAEEAMR</b> 102       |
|                                               |                        | 330 LGGQVSNDVVYAR 342   |       | 9 SASAQQS 15                       |
|                                               |                        |                         |       | 24 QAQLQNNATDQ 34                  |
|                                               |                        |                         |       | 96 GITDESDGIAE 106                 |
|                                               |                        |                         |       | 8 <b>GSGKRATLSSDSGSIRTAEQRA</b> 29 |
|                                               |                        |                         |       | 39 PRYPGL 44                       |
|                                               |                        |                         |       | 56 GLAGSLSGD 64                    |
|                                               |                        |                         |       | 219 KDANDLGG 226                   |
|                                               |                        |                         |       | 39 GGSVPFGQIDSR 50                 |
|                                               |                        |                         |       | 67 MVEFRPIKTKRG 78                 |
|                                               |                        |                         |       | 97 NAAPSDNE 104                    |
|                                               |                        |                         |       | 110 FQDMRFPPGTDESMC 124            |

[illegible]

|                                                               |                                 |                                  |                                          |                                        |                                     |
|---------------------------------------------------------------|---------------------------------|----------------------------------|------------------------------------------|----------------------------------------|-------------------------------------|
| (Multidrug efflux system outer membrane protein OpcM)         | 253AKNELASAQADAVGV              |                                  |                                          | 264AVGVARRRAA                          | 273                                 |
|                                                               | AR <sup>269</sup>               |                                  |                                          | 286PADFAFKETPIVPVAVKIPPGL              | 307                                 |
|                                                               | 396AQYDEQVANYR <sup>406</sup>   |                                  |                                          | 316PDVSA                               | 320                                 |
|                                                               | 415EVEDNLADLR <sup>424</sup>    |                                  |                                          | 332IGLAKSAYFPK                         | 342                                 |
|                                                               |                                 |                                  |                                          | 346TGSFGYEASTLGNLFLWSSRTFLLG           | 370                                 |
|                                                               |                                 |                                  | 421ADLRLLDDQIRAQEA AVNASRR               |                                        |                                     |
|                                                               |                                 |                                  | AAT <sup>445</sup>                       |                                        |                                     |
|                                                               |                                 |                                  | 448RTQYQEGEVAYL                          | 459                                    |                                     |
|                                                               |                                 |                                  | 466RSVLQSQLQANQ                          | 477                                    |                                     |
|                                                               |                                 |                                  | 495GGWGNAPAPTAVGDAASGKAD                 | 515                                    |                                     |
| BCAM2603 (HP)                                                 | 19YDGLTALNAYDEDGR <sup>33</sup> |                                  | 37YAITEGPYAGAK <sup>48</sup>             | 0.507                                  | 5TQRPPFAGK <sup>13</sup>            |
|                                                               |                                 |                                  | 73ATVVHIDDFEAAGTSR <sup>87</sup>         |                                        | 21GLTALNAYDEDGR <sup>33</sup>       |
|                                                               |                                 |                                  |                                          |                                        | 40TEGPYAGAKGEVE <sup>52</sup>       |
|                                                               |                                 |                                  |                                          |                                        | 56QRIAGE <sup>61</sup>              |
|                                                               |                                 |                                  |                                          |                                        | 65ISWQEAD <sup>71</sup>             |
|                                                               |                                 |                                  |                                          | 80DFAAGTSRS <sup>88</sup>              |                                     |
|                                                               |                                 |                                  |                                          | 97FYRLDGS <sup>103</sup>               |                                     |
| BCAM2686 (HP)                                                 |                                 | 118TVESQAADAEAAQPAVEAA           | 108LQAADGVAAR <sup>117</sup>             | 0.543                                  | 318HLKQDVATKQQRIDR <sup>332</sup>   |
|                                                               |                                 | VVK <sup>139</sup>               |                                          |                                        | 351HEALLSQ <sup>357</sup>           |
|                                                               |                                 | 76LAAQAADLPAGAGA                 |                                          |                                        | 359DRLQRNANREAAVAKRV <sup>375</sup> |
|                                                               |                                 | ATK <sup>92</sup>                |                                          |                                        |                                     |
|                                                               |                                 |                                  |                                          |                                        |                                     |
| BCAM2761 (Giant cable pilus - CblA)                           |                                 |                                  | 80LATAPALK <sup>87</sup>                 | 0.501                                  | 67IFTNDKAKD <sup>75</sup>           |
|                                                               |                                 |                                  | 80LATAPALKNQTSPGAAEIPLSVK <sup>102</sup> |                                        | 85ALKNQTSPGAA <sup>95</sup>         |
|                                                               |                                 |                                  | 88NQTSPGAAEIPLSVK <sup>102</sup>         |                                        |                                     |
|                                                               |                                 |                                  | 102LGETELTTTAATLK <sup>116</sup>         |                                        |                                     |
|                                                               |                                 |                                  |                                          |                                        |                                     |
| BCAS0104 (A-type flagellar hook-associated protein 2 - FliD2) |                                 | 52VATLAASQASGNTR <sup>65</sup>   | 439TTALNADLK <sup>447</sup>              | 0.517                                  | 57ASQASGNT <sup>64</sup>            |
|                                                               |                                 | 386DGTLNVDSAK <sup>395</sup>     | 449VAQQQSDLSDYAAQLTK <sup>465</sup>      |                                        | 84TSLKNGALQSTFNAVASG <sup>101</sup> |
|                                                               |                                 | 396LDSALSANPSGVAR <sup>409</sup> |                                          |                                        | 129ALSSSGFNGSKALGT <sup>143</sup>   |
|                                                               |                                 | 421LADQITQFTR <sup>430</sup>     |                                          |                                        | 201KTGSANAI <sup>208</sup>          |
|                                                               |                                 | 481MNTNSQYLTR <sup>490</sup>     |                                          |                                        | 302DTKSQAA <sup>308</sup>           |
|                                                               | 491LFGGANSNGTLSK <sup>503</sup> |                                  |                                          | 326ALSSYTAGASSQGALIGDST <sup>345</sup> |                                     |
|                                                               |                                 |                                  |                                          | 358ARGVDGGGATEKGNHVN <sup>375</sup>    |                                     |
|                                                               |                                 |                                  |                                          | 483TNSQYLTR <sup>490</sup>             |                                     |
|                                                               |                                 |                                  |                                          | 494GANSNGTL <sup>501</sup>             |                                     |



|                                                      |                                                        |                                                                                                                                          |                                                                                                         |       |                                                                                                                                      |
|------------------------------------------------------|--------------------------------------------------------|------------------------------------------------------------------------------------------------------------------------------------------|---------------------------------------------------------------------------------------------------------|-------|--------------------------------------------------------------------------------------------------------------------------------------|
| BCAS0151<br>(HP)                                     |                                                        | <sup>11</sup> SPLADSGVTANAPAATSSSGG<br>TTDAASTTGTTGATGATDTTR <sup>44</sup><br><sup>58</sup> DSTGATGETLGAAGASSEDPA<br>VAQLK <sup>83</sup> | <sup>1</sup> MQIDFSTTAR <sup>10</sup>                                                                   | 0.567 | <sup>94</sup> ATLERQ <sup>99</sup><br><sup>104</sup> AQRAKDDPAAAVEQQSLSA <sup>122</sup><br><sup>144</sup> KSGGSPSGGLV <sup>154</sup> |
| BCAS0236<br>(Trimeric<br>autotransporter<br>adhesin) | <sup>1057</sup> QITNVADGTGQQDAVT<br>VR <sup>1074</sup> |                                                                                                                                          | <sup>1017</sup> AVVPSSGILR <sup>1026</sup>                                                              | 0.667 | -                                                                                                                                    |
| BCAS0522<br>(HP)                                     |                                                        |                                                                                                                                          | <sup>3</sup> THQPILTTSVTAAAGLNR <sup>20</sup><br><sup>85</sup> ATGASNGYALDAATAAGDVIR <sup>105</sup>     | 0.501 | <sup>19</sup> <b>NRFQFVGFDGGV</b> <sup>30</sup><br><sup>43</sup> TTADVGEQA <sup>51</sup>                                             |
| BCAS0750<br>(HP)                                     |                                                        | <sup>171</sup> GSASAQGGAL <sup>180</sup>                                                                                                 | <sup>130</sup> SHAQGAVSTAGDVAGGAK <sup>147</sup><br><sup>150</sup> AGEALEGATNAVQGGASVGVK <sup>170</sup> | 0.568 | -                                                                                                                                    |

<sup>1</sup>Peptides identified using surface-shaving with trypsin and LC-MS/MS analysis.

<sup>2</sup><http://tools.iedb.org/bcell/>. Threshold used of 0.5.

<sup>3</sup>Epitopes shorter than 5 or larger than 25 amino acids were not considered. At bold are the predicted B cell epitopes found by the Surface-shaving approach.

\*Peptide has an oxidation in the fourth amino acid (Methionine)
